## Disentangling presentation and processing times in the brain

Laurent Caplette<sup>1\*</sup>, Robin A. A. Ince<sup>2</sup>, Karim Jerbi<sup>1</sup> & Frédéric Gosselin<sup>1</sup>

<sup>1</sup>Department of Psychology, Université de Montréal, Montréal, Qc, Canada

<sup>2</sup>Institute of Neuroscience and Psychology, University of Glasgow, Glasgow, United Kingdom

Corresponding author: Laurent Caplette

Email: [laurent.caplette@yale.edu](mailto:laurent.caplette@yale.edu)

Phone: 1-203-376-0003

Present address: Department of Psychology, Yale University, 2 Hillhouse Avenue, Montréal, New Haven, CT 06520, U.S.A.

Keywords: temporal processing, presentation time, object recognition, face recognition, EEG.

1  
2  
3  
4  
5  
6  
7  
8  
9  
10  
11  
12  
13  
14  
15  
16  
17  
18  
19

## Abstract

Visual object recognition seems to occur almost instantaneously. However, not only does it require hundreds of milliseconds of processing, but our eyes also typically fixate the object for hundreds of milliseconds. Consequently, information reaching our eyes at different moments is processed in the brain together. Moreover, information received at different moments during fixation is likely to be processed differently, notably because different features might be selectively attended at different moments. Here, we introduce a novel reverse correlation paradigm that allows us to uncover with millisecond precision the processing time course of specific information received on the retina at specific moments. Using faces as stimuli, we observed that processing at several electrodes and latencies was different depending on the moment at which information was received. Some of these variations were caused by a disruption occurring 160-200 ms after the face onset, suggesting a role of the N170 ERP component in gating information processing; others hinted at temporal compression and integration mechanisms. Importantly, the observed differences were not explained by simple adaptation or repetition priming, they were modulated by the task, and they were correlated with differences in behavior. These results suggest that top-down routines of information sampling are applied to the continuous visual input, even within a single eye fixation.

## 20 1 Introduction

21 Visual object recognition is a process that seems to occur almost instantaneously.  
22 However, this is just an impression: not only does our brain process the object for hundreds  
23 of milliseconds, but we will typically fixate it for hundreds of milliseconds too. Of course,  
24 light reflected on the object continually hits our retina throughout this fixation. The light  
25 reaching our eyes at each specific moment will then be processed in the brain. Since  
26 processing takes some time, light reaching our eyes at different moments during the  
27 fixation will typically be processed in the brain at the same moment (but possibly at  
28 different processing levels; Figure 1). The brain activity evoked by the perception of an  
29 object is a combination of the brain responses to information received on the retina at  
30 different moments.

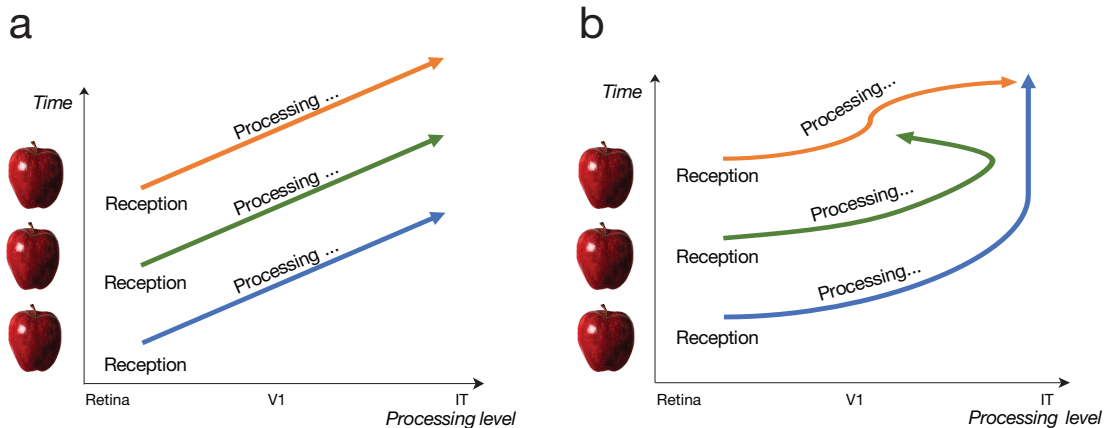

31  
32 **Figure 1.** At any given point in time (any horizontal imaginary line in the above graphs), information received  
33 at different moments during fixation is simultaneously processed in the brain (possibly at different processing  
34 levels). **A)** Processing is identical for information received at different moments. **B)** Processing is different  
35 for information received at different moments.

36 We can expect visual information received at different moments to be processed  
37 differently (Figure 1b). This is partly because of the limited processing capacity of higher  
38 visual areas<sup>1-2</sup>, which prevents too much information from being processed simultaneously.  
39 One strategy that can be applied by the visual system to overcome this limitation is to use

40 visual information received in different time windows to process different features (e.g.,  
41 different regions of space, colors or spatial frequencies). This is often referred to as top-  
42 down attention being guided from one feature to another<sup>3-4</sup>, as a visual routine<sup>5</sup>, or simply  
43 as a sampling of different features across time.

44 The use of the information received at specific moments to process specific features  
45 may arise because this is a more efficient strategy for some tasks than using information  
46 received at any moment to process any feature<sup>5</sup>. Moreover, specific strategies may be more  
47 efficient than others. For example, it may be computationally more efficient to process  
48 coarse information before finer noisier features, when recognizing objects or scenes<sup>6-7</sup>, and  
49 so, high visual areas might process coarse information received early and fine information  
50 received late but not fine information received early. It follows that relatively stable  
51 strategies may occur in individuals, or even across individuals. Other biases may also result  
52 in stable strategies: for example, a tendency to process the most informative features in the  
53 information received first (which is probably an evolutionarily sensible strategy), or an  
54 attempt to compensate anatomical limitations (e.g., process color from the information  
55 received earlier because color is processed more slowly<sup>8-9</sup>). These strategies are likely to  
56 depend on the expected input and on the task.

57 How information received at different moments within a fixation is processed for  
58 object recognition is rarely investigated, possibly in part because the distinction between  
59 stimulus presentation time and processing time is not often discussed or appreciated (but  
60 see 10). Still, a few behavioral studies have examined this question, either by randomly  
61 revealing image features across time<sup>9,11-14</sup> or by adding noise that is randomly varying  
62 across time<sup>15-16</sup>, and by correlating the samples with the subject's response. These methods

63 and similar ones (e.g., randomly varying inter-stimulus intervals with high resolution) have  
64 been employed several times in the related literature on attention and detection  
65 mechanisms<sup>17-22</sup>. Using such methods in object recognition paradigms has led to multiple  
66 demonstrations of how observers use the information received at different moments to  
67 categorize an object. Interestingly, these strategies often seem stable across individuals.  
68 For example, as it was hypothesized, correct responses correlate with high spatial  
69 frequency, or fine, information received late, and with low spatial frequency, or coarse,  
70 information received early and late<sup>12-13,23</sup> (see also 24-25). These strategies also seem to be  
71 contingent on the task at hand<sup>26</sup>.

72 While studies have been conducted on the effects of stimulus onset asynchrony<sup>27</sup>,  
73 duration<sup>28-29</sup>, and ordering<sup>30</sup> on brain activity, the processing by the brain of information  
74 received at specific *moments* during a fixation has, to our knowledge, never been  
75 investigated. This a fundamentally different endeavor: decomposing the processing time  
76 course of an object according to the moment at which information is received should inform  
77 us about the neural mechanisms underlying the differential sampling and integration of  
78 information across time. It should allow us to disentangle the sampling and the processing  
79 of visual information, which are both unraveling through time.

80 In this study, we aimed to perform such a decomposition. To do so, we randomly  
81 sampled the features of a face across time while subjects were performing a gender or  
82 expression recognition task<sup>9,14</sup> (Figure 2; Movies S1-S4) and while their EEG activity was  
83 recorded. Faces were chosen as stimuli because they are important social stimuli that  
84 human brains are wired by evolutionary pressures to process efficiently; moreover, faces  
85 are particularly well suited to a spatial sampling of information as they all are composed

86 of the same spatial features with essentially the same spatial configuration. To ensure that  
87 subjects could initiate a potential top-down sampling strategy on time, face stimuli  
88 occurred at predictable moments. We then reverse correlated brain activity at all time points  
89 to information presented in different time windows. We had three main hypotheses: 1) the  
90 processing time course of information received at different moments will be different; 2)  
91 this modulation of processing by the time at which information is received will itself be  
92 modulated by the task; and 3) variations in the processing of information received at  
93 different moments will correlate to variations in the behavioral use of this information for  
94 the task.  
95

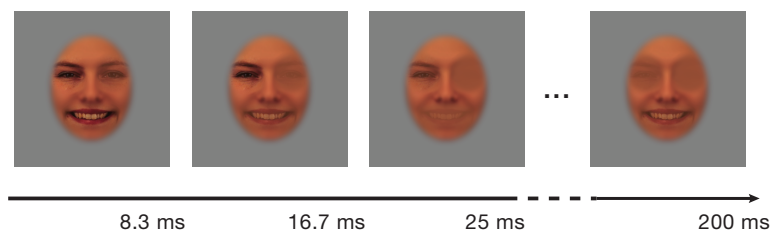

**Figure 2.** Example of a video stimulus used in a random trial. The three face features were smoothly revealed in random frames (1 frame each 8.3 ms) across 200 ms. See movies S1-S4.

96

## 97 **2 Materials and Methods**

98

### 99 **2.1 Participants**

100 Twenty-four neurotypical adults (mean age = 23.0 years; SD = 2.9) were recruited  
101 on the campus of the University of Montreal. Participants did not suffer from any  
102 psychiatric or psychological disorder and had no known history of head concussions. The  
103 experimental protocol was approved by the ethics board of the Faculty of Arts and Sciences  
104 of the University of Montreal and the study was carried in accordance with the approved

105 guidelines. Written informed consent was obtained from all the participants after the  
106 procedure had been fully explained, and a monetary compensation was provided upon  
107 completion of each experimental session.

108

## 109 **2.2 Materials**

110 The experimental program ran on a Ciara Discovery computer with Windows 7 in  
111 the Matlab environment, using custom scripts and functions from the Psychophysics  
112 Toolbox<sup>42-44</sup>. Stimuli were shown on an Asus VG278H monitor, calibrated to allow a linear  
113 manipulation of luminance, with a resolution of  $1920 \times 1080$  pixels and a 120 Hz refresh  
114 rate. Luminance values ranged from  $2.47 \text{ cd/m}^2$  to  $269 \text{ cd/m}^2$ . A chin rest was used to  
115 maintain a viewing distance of 76 cm. EEG activity was recorded using an ANT Neuro  
116 Waveguard 64-electrode cap with Ag/AgCl electrodes, using a sampling rate of 1024 Hz  
117 and a resolution of 12 bits. Linked mastoids served as initial common reference. Vertical  
118 electro-oculogram (vEOG) was bipolarly registered above and below the dominant eye and  
119 horizontal electro-oculogram (hEOG) at the outer canthi of both eyes. Electrode impedance  
120 was kept below  $10 \text{ k}\Omega$  during recording.

121

## 122 **2.3 Stimuli and sampling**

123 Two hundred and sixty-four color images of faces were selected from the image  
124 database *Karolinska Directed Emotional Faces* (KDEF)<sup>45</sup>; only faces facing the camera  
125 were chosen. These were composed of 66 different identities (33 women and 33 men) each  
126 performing a happy and a neutral expression; two different pictures of each facial  
127 expression were used. Faces were aligned on twenty hand-annotated landmarks averaged

128 to six mean coordinates for left and right eyes, left and right eyebrows, nose and mouth,  
129 using a Procrustes transformation.

130 We then created an uninformative face background by taking the mean of all  
131 aligned faces and applying a lightly smoothed elliptical mask (horizontal radius = 6 degrees  
132 of visual angle) to conceal the background, hair and shoulders. The areas including and  
133 surrounding the eyes and eyebrows were then covered by two lightly smoothed  
134 approximately circular masks; the area including and surrounding the mouth was covered  
135 by a lightly smoothed elliptical mask. The color of these masks was the mean color of the  
136 unmasked parts of the average face. The three feature masks were of equal area (within a  
137 <1% margin; since feature masks were smoothed, area covered was computed by summing  
138 the mask pixel values).

139 For use in the sampled-face trials, the mean luminance and the contrast of all  
140 aligned faces (within the feature areas determined by the feature masks previously  
141 discussed) were equalized, separately for each color channel, using the SHINE toolbox<sup>46</sup>.  
142 The same procedure was applied but for the whole face (inside the elliptical mask), for use  
143 in the whole-face trials.

144 On each sampled-face trial, the face features of a randomly selected exemplar face  
145 were gradually revealed at random moments across a total duration of 200 ms; that is,  
146 masked feature areas of the uninformative face background were replaced by the features  
147 of an exemplar face (Figure 2; Movies S1-S4). A duration of 200 ms was chosen so that no  
148 saccade would occur during stimulus presentation on most trials. Specifically, on each trial,  
149 a random  $3 \times 72$  sparse matrix composed of zeros and a few ones (the probability of each  
150 element being one was constant and was 0.025) was created; each row of 72 elements was



151 then convolved with a 1-D gaussian kernel, or “bubble”<sup>14,32</sup>, with a 1.8 frame (15 ms)  
152 standard deviation. Superfluous padding was removed so that the final smoothed matrix  
153 was  $3 \times 24$  in size and thresholding was applied so that no value exceeded 1. We called  
154 this matrix *sampling matrix* and the value of each element determined the visibility of a  
155 given face feature through the feature background in a given video frame for this trial; more  
156 precisely,  $p_{ijk} = f_{ik} \cdot s_{ijk} + b \cdot (1 - s_{ijk})$ , where  $p_{ijk}$  are the pixel values to be displayed  
157 for face feature  $i$  on frame  $j$  in trial  $k$ ,  $f_{ik}$  are the original pixel values of face feature  $i$  of the  
158 exemplar face selected for trial  $k$ ,  $s_{ijk}$  is the sampling matrix value for face feature  $i$  on  
159 frame  $j$  in trial  $k$ , and  $b$  is the feature background color.

160

## 161 2.4 Experimental design

162 Each participant came to the laboratory twice and filled in a personal information  
163 questionnaire (education, age, sex, hours of sleep, alertness, concussion history, mental  
164 illness history, etc.) on the first session. Participants completed a total of 1000 sampled-  
165 face trials in each session; nine participants also completed in each session 100 additional  
166 whole-face trials in which a non-sampled exemplar face was shown for the same amount  
167 of time. Sampled-face and whole-face trials were randomly intermixed throughout the  
168 experiment. Each experimental session was divided in four equal-size blocks (of 250 or  
169 275 trials) and blocks were interleaved with breaks of approximately 5 minutes. In addition,  
170 after every 5 trials, the screen automatically showed text indicating that the participants  
171 could take a few seconds to blink and rest their eyes before pressing a key to continue the  
172 experiment (participants were instructed not to blink during the trials themselves).

173 On each trial, a central fixation cross was shown to the participants for 1500 ms,  
174 after which the video stimulus appeared during 200 ms, superposed to the fixation cross,  
175 again followed by the fixation cross until the participant responded (the next trial then  
176 followed after an additional constant 1500 ms); a mid-gray background was always present.  
177 A fixed inter-trial interval was used so that participants could predict the onset of the trials.  
178 Half of the participants had to categorize the sex of the faces while the other half had to  
179 categorize their expression (happy or neutral). Participants had to respond as accurately  
180 and rapidly as possible with two keys on the keyboard (half of the participants had to use  
181 the opposite key combination from the other half, to counterbalance any motor effect).

182

## 183 **2.5 Behavioral data analysis**

184 One session from one participant was removed from all analyses because its mean  
185 accuracy was 50%; a session from a different participant was removed because of  
186 prominent EEG artifacts on a large subset of trials. Finally, one 275-trial block from still  
187 another participant was lost due to a technical error.

188 Accuracies and response times were z-scored within each 250- or 275-trial block.  
189 Trials with a z-scored response time below -3 or above 3, or with an absolute response time  
190 below 100 ms or above 2000 ms, were excluded from further analyses. Sampling matrices  
191 weighted by z-scored accuracies were then averaged together for each session. (Such a  
192 weighted sum is equivalent to a linear regression here since sampling was random.)  
193 Resulting *classification images* were averaged together within each subject and then within  
194 each task. Analyses were repeated with randomly permuted accuracies 10,000 times and a  
195 statistical threshold ( $p < .05$ , one-tailed, pixel level, corrected for familywise error rate

196 (FWER)) was determined using the maximum statistic method<sup>47</sup>. Since we were only  
197 interested in which information was used to do the task, we only assessed positive  
198 correlations and performed a one-tailed test.

199

## 200 **2.6 EEG data preprocessing**

201 All preprocessing was performed with the help of functions from the Fieldtrip  
202 toolbox<sup>48</sup>. EEG raw data from each session was segmented in trials, filtered between 1 and  
203 30 Hz with two successive 4<sup>th</sup> order Butterworth IIR filters, baseline corrected using the  
204 average activity between 500 ms and 250 ms before stimulus presentation, and down-  
205 sampled to a 250 Hz sampling rate. Mastoid electrodes were removed due to poor signal-  
206 to-noise ratio on most subjects and data was re-referenced to an average reference.  
207 Anomalous trials, trials in which eye movements were occurring during the stimulus and  
208 anomalous electrodes were identified and removed following careful visual inspection of  
209 the data (mean number of trials = 4.5 (0.5%), SD = 9.22 (0.9%)); bad channels were  
210 interpolated using a spherical spline (mean number of channels = 1.02, SD = 0.81) . An  
211 ICA using Hyvärinen's fixed-point algorithm<sup>49</sup> was then performed to identify blink and  
212 eye movement artifacts. Bad components were identified and removed following careful  
213 visual inspection (mean number of components = 1.38, SD = 0.65). Finally, we computed  
214 single-trial current scalp density (CSD) waveforms using the spherical spline method  
215 ( $\lambda = 1e-5$ , spline order = 4, degree of Legendre polynomials = 14)<sup>50-51</sup>; all further  
216 analyses were conducted on this CSD data.

217

218

## 219 **2.7 EEG data analysis**

### 220 *2.7.1 Falsely correct trials*

221 In every experiment in which performance is not at ceiling level, part of the trials  
222 initially labeled as correct are correct only by chance: e.g., if 20% of responses are  
223 incorrect, this means that another 20% was in fact correct only by chance (since there is a  
224 50% chance of being correct or incorrect when guessing). Here, we can verify which trials  
225 are comprised in this percentage of “falsely” correct trials by verifying which are the trials  
226 whose sampling matrices correlate the least to the behavioral classification image. Using  
227 this novel analysis method, we kept only true correct trials which were not correct merely  
228 by chance for further analyses.

### 229 *2.7.2 Regression analyses*

230 Trials with a z-scored response time below -3 or above 3, or with an absolute  
231 response time below 100 ms or above 2000 ms, were excluded from the regression  
232 analyses. For each session, electrode and time point, regularized (ridge) multiple linear  
233 regressions were performed between the standardized feature  $\times$  presentation time sampling  
234 planes and the standardized EEG amplitudes (Figure S1a). Resulting regression  
235 coefficients were convolved with a Gaussian kernel (standard deviation of 3 time points,  
236 or 12 ms) in the EEG time dimension. Maps of regression coefficients were averaged  
237 within each subject and then across subjects within each task. Analyses were repeated with  
238 randomly permuted trials 1,000 times and statistical thresholds ( $p < .05$ , two-tailed, FWER-  
239 corrected) at both the pixel and cluster (2D clusters across EEG time and presentation time;  
240 using the summed cluster values; arbitrary primary threshold of  $p < .01$ , two-tailed,  
241 uncorrected) levels were determined using the maximum statistic method<sup>47</sup>. Analyses were

242 restricted to time points between 30 ms and 600 ms from face onset. Results are displayed  
243 for representative PO7 (left occipito-temporal; LOT) and PO8 (right occipito-temporal;  
244 ROT) sensors but multiple comparison corrections were applied across all electrodes.  
245 Results were similar for most occipito-temporal sensors; data from all electrodes is  
246 available in an online repository (<https://osf.io/3r782/>).

### 247 *2.7.3 Task × stimulus moment ANOVA*

248 To investigate whether processing was significantly modulated by the presentation  
249 moment and the task, a task × presentation moment ANOVA was performed. Maps of  
250 regression coefficients for each subject, face feature and electrode were first linearly  
251 interpolated to a resolution of 0.1 ms, realigned to the feature onset instead of the face onset  
252 (e.g., the EEG activity for the first presentation moment stayed the same, while activity for  
253 the second one was shifted left by 8.3 ms, activity for the third one by 16.7 ms, and so on),  
254 and resampled to the original resolution of 4 ms. Task × presentation moment ANOVAs  
255 were then performed on individual subjects' regression coefficients for each face feature,  
256 electrode, and latency from the feature onset (Figure S1b). Resulting F values were  
257 interpolated in topography space using biharmonic spline interpolation<sup>52</sup>. Analyses were  
258 repeated on the 1,000 null maps obtained by randomly permuting trials and statistical  
259 thresholds ( $p < .05$ , one-tailed, FWER-corrected) at both the pixel and cluster (3D clusters  
260 across EEG time and topography space; using the summed cluster values; arbitrary primary  
261 threshold of  $p < .01$ , one-tailed, uncorrected) levels were determined using the maximum  
262 statistic method<sup>47</sup>. A one-tailed test was performed given that F statistics are non-negative.  
263 Analyses were restricted to time points between 50 ms and 400 ms from feature onset.

264

## 265 **2. 8 Mutual information between brain and behavior regression coefficients**

266 For each subject, electrode and latency from feature onset, Gaussian copula mutual  
267 information<sup>53-54</sup> was computed between the results of the behavior-stimulus weighted sum  
268 and the absolute values of the results of the EEG-stimulus regression, across stimulus  
269 moments (stimulus presentation time frames). Analyses were repeated with regression  
270 coefficients from the 1,000 null maps obtained by randomly permuting trials and statistical  
271 thresholds ( $p < .05$ , one-tailed, FWER-corrected) at both the pixel and cluster (3D clusters  
272 across EEG time and topography space; using the summed cluster values; arbitrary primary  
273 threshold of  $p < .01$ , one-tailed, uncorrected) levels were determined using the maximum  
274 statistic method<sup>47</sup>. A one-tailed test was performed given that mutual information is non-  
275 negative. Analyses were restricted to time points between 50 ms and 400 ms from feature  
276 onset.

277

278

## 279 **3 Results**

280

### 281 **3.1 Time course of information use**

282 Mean accuracy was 75.8% ( $\sigma = 4.2\%$ ) in the gender task and 82.9% ( $\sigma = 6.2\%$ ) in  
283 the expression task. Mean response time was 711 ms ( $\sigma = 87$  ms) in the gender task and  
284 662 ms ( $\sigma = 100$  ms) in the expression task.

285 To identify which face features in which time frames led to accurate responses, we  
286 performed for each session a sum of sampling matrices (indicating the visibility of each

287 face feature at each time frame in the stimulus on each trial) weighted by accuracies. Mean  
288 results for each task are displayed in Figure 3. As we can see, both eyes were used  
289 at all except the earliest moments, while the mouth was used throughout the presentation  
290 to identify the expression of the face. These results replicate previous studies using a spatial  
291 sampling of the whole face<sup>9,31-33</sup>.

292 Note that these time points refer to the moment of presentation of the feature within  
293 the stimulus, and so, equivalently, to the moment at which information is received on the  
294 retina. To avoid any confusion with processing time (as assessed with EEG), we refer to  
295 this time dimension as stimulus time; to avoid any confusion with stimulus duration, we  
296 will usually refer to stimulus “moments”.

297

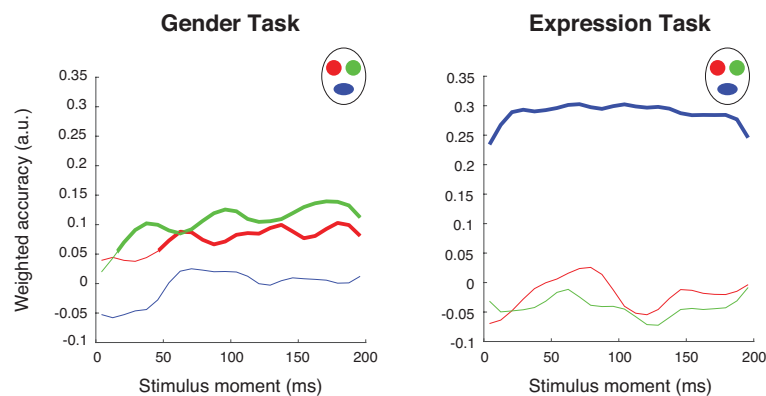

**Figure 3.** Behavioral results indicating, for each task, how each feature presented on each frame correlates with correct responses. Bold segments of line indicate frames that are significant ( $p < .05$ , one-tailed, FWER-corrected).

298

### 299 3.2 Visual Evoked Potentials

300 To verify if our sampling method elicited, on average, similar ERPs to whole  
301 unaltered faces, we computed the average of all trials with sampled and whole faces, for  
302 those subjects who performed the task on both kinds of trials. We display the ERPs of  
303 representative left and right occipito-temporal sensors (LOT and ROT), and the overall

304 topographies (Figure 4). As we can see, ERPs and their associated topographies are very  
305 similar between the conditions. We computed the difference between the ERPs and  
306 assessed its significance using a paired permutation test (500 permutations): there was no  
307 significant difference between the conditions at any time point on either sensor ( $p > .05$ ,  
308 two-tailed, FWER-corrected with the maximum statistic method). This suggests that our  
309 sampling method did not greatly alter the average brain response to faces.

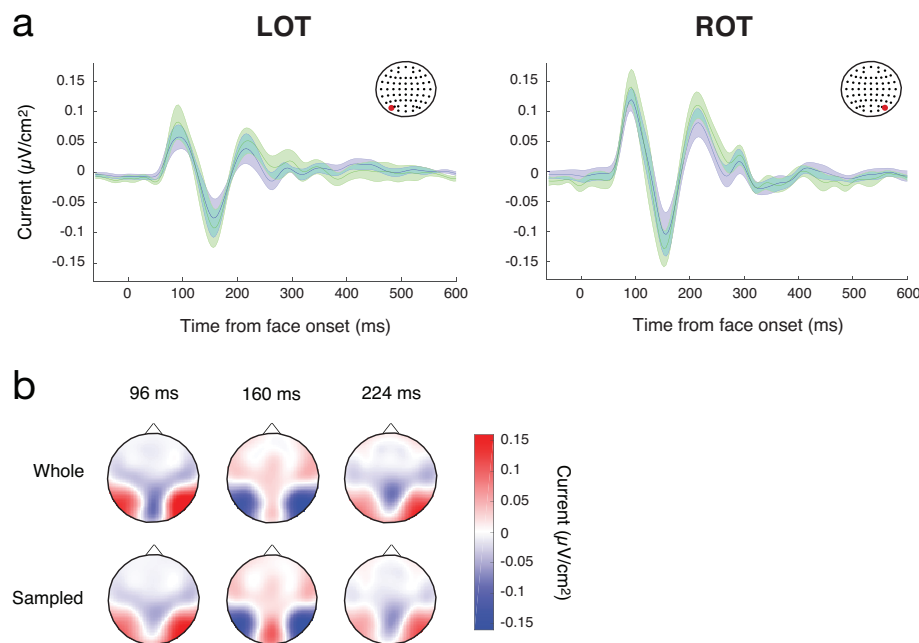

**Figure 4.** A) Mean ERPs for whole (green) and sampled (blue) faces on LOT and ROT. Shaded areas represent standard errors above and below the mean. B) Topographies for whole and sampled faces at selected latencies.

310

### 311 3.3 Uncovering the processing of information received at different moments

312 For each session, ridge regressions were performed between sampling matrices of  
313 correct trials and EEG amplitude on each time point and electrode (see Methods; Figure  
314 S1a). Although analyses were conducted on all electrodes (and appropriate corrections for  
315 multiple comparisons were applied), we will mostly focus on results from occipito-  
316 temporal sensors (see also Figure S4 for summary scalp maps computed using global



317 power). Mean maps of regression coefficients are displayed for representative left and right  
318 occipito-temporal sensors (LOT and ROT) on Figures 5 (gender task) and 6 (expression  
319 task). These maps show a complete portrait of what is happening during visual recognition:  
320 how information impinging the retina at different moments throughout fixation is  
321 simultaneously processed through time in the brain.

322 We can immediately see on most maps (especially the ones for the mouth and the  
323 contralateral eyes) a clear diagonal trend: as it could be expected, information received on  
324 the retina  $x$  ms later is on average processed  $x$  ms later in the brain. This processing takes  
325 the form, in most cases, of a positive activation followed by a negative one and another  
326 positive one (analogous to the classic P1, N170 and P3 components). However, there also  
327 seem to be important differences in amplitude across stimulus moments. In the next section,  
328 we look at these differences in more details.

329

### 330 **3.4 Investigating differences in processing across stimulus moments**

331 To assess whether differences in processing across stimulus moments are  
332 statistically significant, we conducted a task  $\times$  stimulus moment ANOVA on regression  
333 coefficients for each face feature, electrode and EEG latency, after having realigned each  
334 row of the previous maps so that the zero point on the  $x$  axis is the feature onset rather than  
335 the face onset (see Methods; Figure S1b).

336 Significant modulation of processing by the stimulus moment is visible during  
337 almost all the analyzed time window (~50-360 ms; Figure 7). Differences are strongest on  
338 occipito-temporal sensors, but they are also present on central and frontal sensors,

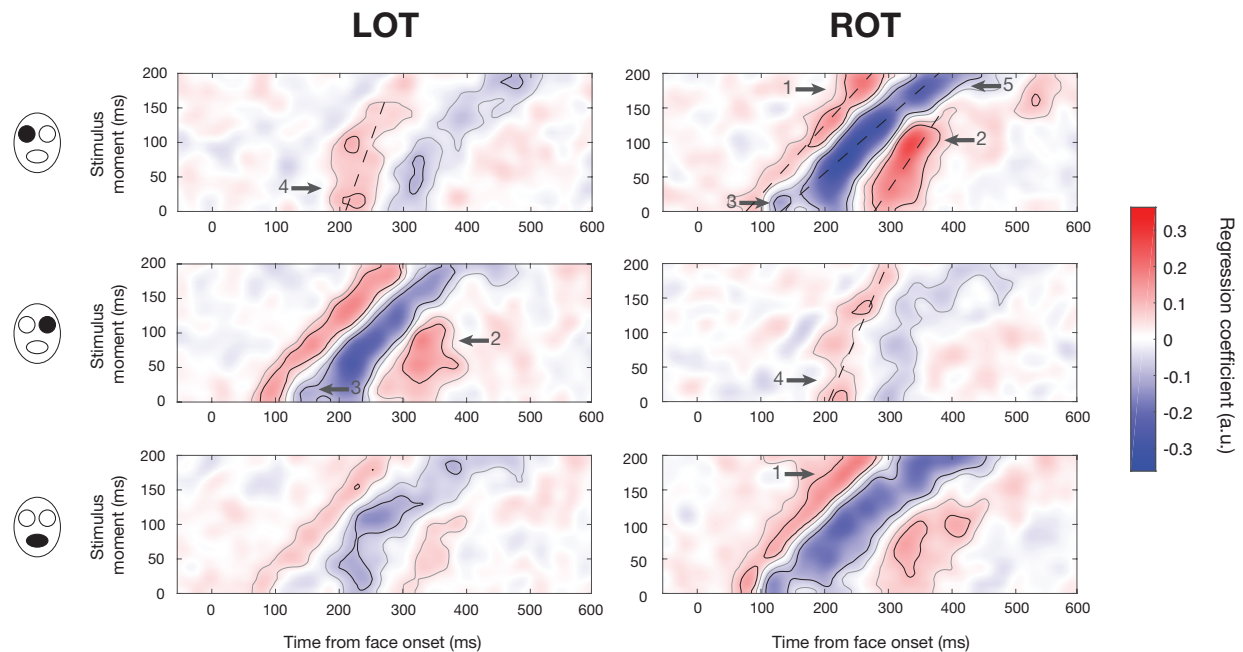

**Figure 5.** Mean maps of regression coefficients for each face feature (rows) on LOT and ROT sensors (columns) for the gender task. Within each map, each row refers to the EEG activity (across time) related to the presentation of the face feature on a given frame within the stimulus, i.e. the processing of information received on the retina at a specific moment. Gray outlines indicate significance at the cluster level and black outlines indicate significance at the pixel level ( $p < .05$ , two-tailed, FWER-corrected). Dashed lines illustrate components with slopes different from one. Arrows point toward some results of interest: (1) an increase in early activity for information received later; (2) late activity is maximal for information received mid-fixation; (3) additional negative peak for information received at the fixation onset; (4) large latency shift for activity related to information received early on ipsilateral electrodes; and (5) increased latency of negative activity for information received at the end of fixation.

339 especially at higher latencies (e.g., there is a significant effect of stimulus moment peaking  
340 between 300 and 350 ms on frontal Fpz sensor).

341 On occipito-temporal sensors, variations in the amplitude of the first positive  
342 activation across stimulus moments are leading to significant differences around a latency  
343 of 80-100 ms: specifically, this activation is stronger at late stimulus moments or at all  
344 except intermediate stimulus moments (Arrow 1, Figures 5-6). The last positive activation

345 peaking at intermediate stimulus moments is also a source of significant variations around  
346 300 ms (Arrow 2, Figures 5-6).  
347

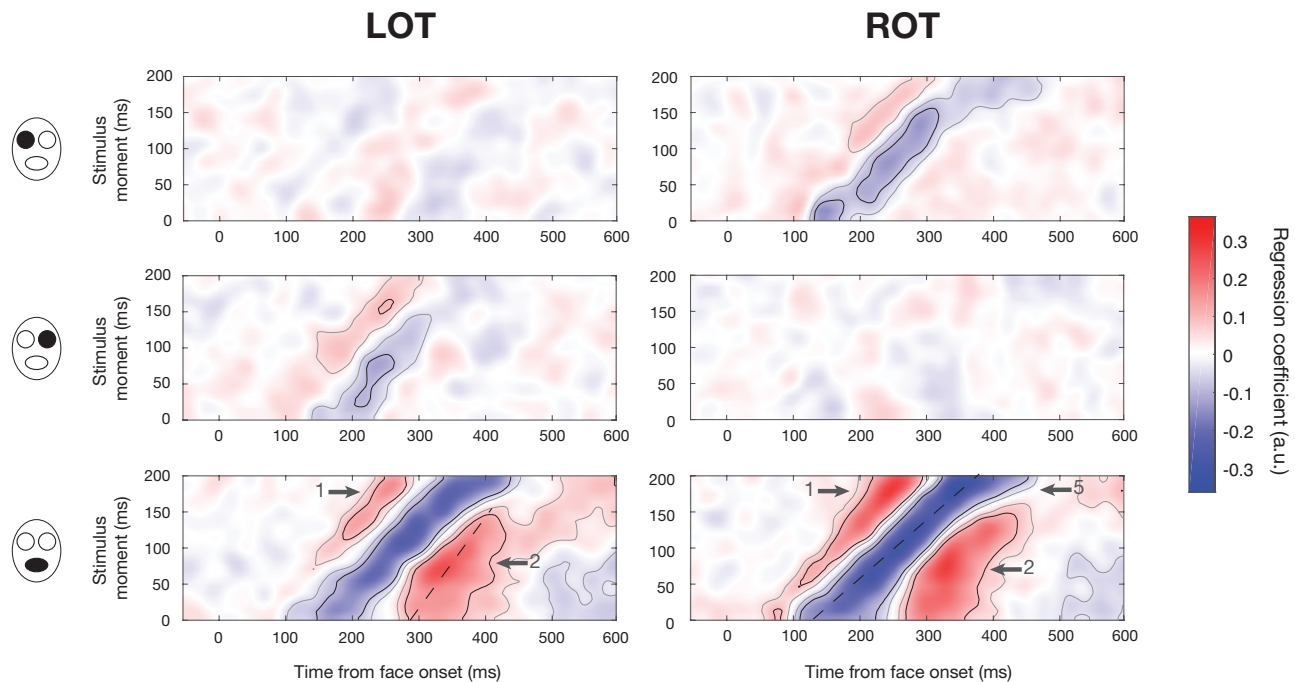

**Figure 6.** Mean maps of regression coefficients for each face feature (rows) on LOT and ROT sensors (columns) for the expression task. Within each map, each row refers to the EEG activity (across time) related to the presentation of the face feature on a given frame within the stimulus, i.e. the processing of information received on the retina at a specific moment. Gray outlines indicate significance at the cluster level and black outlines indicate significance at the pixel level ( $p < .05$ , two-tailed, FWER-corrected). Dashed lines illustrate components with slopes different from one. Arrows indicate results of interest : (1) an increase in early activity for information received later; (2) late activity is maximal for information received mid-fixation; (5) increased latency of negative activity for information received at the end of fixation.

#### 348 3.4.1 An additional negative peak for early stimulus moments

349 Interestingly, significant differences in amplitude around 150 ms for the  
350 contralateral eyes in the gender task are partly driven by the presence of an apparent  
351 additional peak, for the early stimulus moments (Arrow 3, Figure 5). We verified whether  
352 these two peaks represented two distinct components with different topographies. To do  
353 so, we used the maps of regression coefficients for individual sessions and looked at the  
354 topographies (one value for each electrode) associated with both peaks (at the same

355 stimulus moment); we analyzed the 12 subjects performing the gender task. We thus had  
356 four topographies per subject and per eye: one for each peak in each session. For each  
357 subject, we computed a cosine similarity metric ( $1 - \text{the absolute value of the cosine angle}$ )  
358 between the topographies associated to the same peak on different days and averaged them:  
359 this is the within-peak similarity. Next, we computed the same metric for topographies  
360 associated to different peaks on different days and averaged them: this is the between-peaks  
361 similarity. We finally performed t-tests between these similarity metrics: the within-peak  
362 similarities were significantly greater for the right eye ( $t(11) = 4.76, p_{Bonf} = .002$ ) but not  
363 for the left eye ( $t(11) = 1.38, p_{Bonf} > .10$ ). When using the topographies associated to  
364 different peaks on the *same* day to compute the similarity metric, we still obtained  
365 significantly greater within-peak similarities for the right eye but not for the left eye (left  
366 eye:  $t(11) = 0.97, p_{Bonf} > .10$ ; right eye:  $t(11) = 3.07, p_{Bonf} = .042$ ). In other words, for the  
367 right eye feature at least, topographies associated with the same peak obtained on different  
368 days are more similar than topographies associated to different peaks, even when these are  
369 obtained on the same day. Consequently, each peak represents a distinct activation with its  
370 own topography and neural generators, with the first one being especially sensitive to the  
371 onset and stopping being receptive after only about 20 ms.

372

### 373 *3.4.2 Variations in latencies across stimulus moments*

374 Other variations on occipito-temporal sensors seem to be driven by increases or  
375 decreases in the latency of a component across stimulus moments. To investigate this, we  
376 computed, for each major component, task and feature, the peak latency at each significant  
377 stimulus moment on LOT and ROT (significance at the cluster level; ignoring activations

378 past 500 ms from the face onset). We then fitted a line across these latencies (see dashed  
 379 lines on Figures 5 and 6) and tested (one-sample t-test) whether the slope of the line was  
 380 significantly different from 1. Here, a slope of 1 would mean that the feature takes the same  
 381 time to be processed at all stimulus moments, whereas a larger slope would mean that the  
 382 feature takes increasingly longer to be  
 383 processed with increasing stimulus  
 384 moment, and a smaller slope that the  
 385 feature takes an increasingly shorter  
 386 time to be processed with increasing  
 387 stimulus moment; a slope of 0 would  
 388 mean that features are processed at the  
 389 same moment irrespectively of when  
 390 they were received on the retina. In  
 391 most cases, the latency of the first  
 392 positive component from the feature  
 393 onset was approximately constant (i.e.  
 394 same processing duration for all  
 395 stimulus moments; slopes between 0.90  
 396 and 1.04,  $R^2_{adj} > .96$ ,  $df \geq 11$ ,  $t < 2.92$ ,  
 397  $p_{Bonf} > .10$ ) except in the case of the  
 398 right eye on LOT in the gender task,  
 399 where it was slightly increasing (slope  
 400 = 1.08,  $R^2_{adj} = .99$ ,  $t(22) = 3.24$ ,  $p_{Bonf} =$

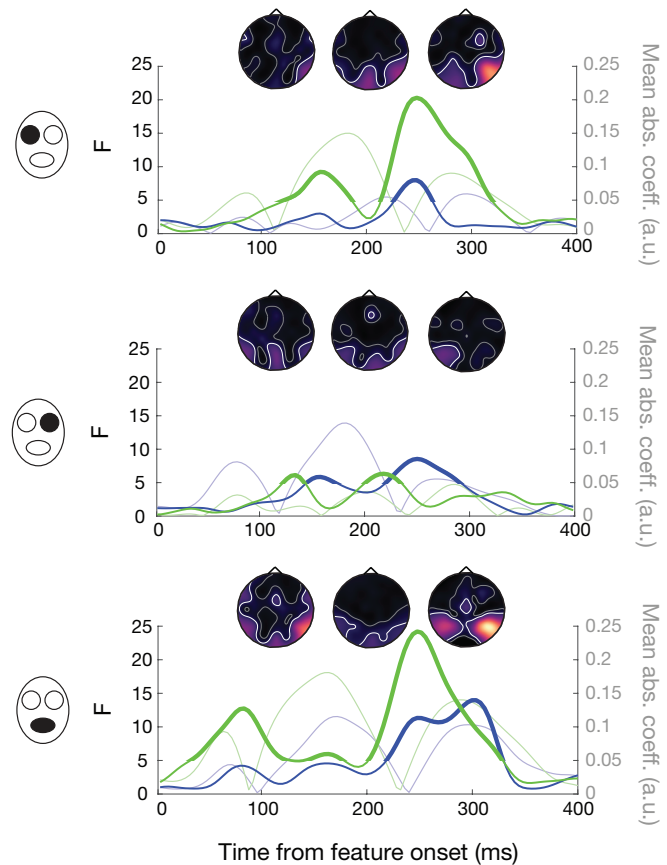

**Figure 7.** Effect of stimulus moment on EEG activity, for each face feature. F values are shown for all latencies (from the feature onset) for LOT (blue) and ROT (green) sensors; bold segments indicate time points significant at the pixel level ( $p < .05$ , FWER-corrected across sensors and time). These F values indicate how much activity at a given latency is influenced by the exact moment at which information is presented within the stimulus. These time courses are superposed to the mean magnitudes (across stimulus moments) of the regression coefficients (in smaller point and less saturated color). Higher F values do not necessarily coincide with higher average activity. Topographies depict the temporal progression of the effect of presentation moment across the whole scalp: latencies of 100, 150 and 250 ms are shown. Lighter colors indicate higher F values; white curves indicate areas significant at the pixel level and gray curves indicate areas significant at the cluster level ( $p < .05$ , one-tailed, FWER-corrected across topography and time).

401 .049) and in the case of the eyes on ipsilateral electrodes in the gender task where it was  
402 decreasing (slopes  $< .44$ ,  $R^2_{\text{adj}} > .27$ ,  $df \geq 17$ ,  $t > 8.84$ ,  $p_{\text{Bonf}} < 1.2 \times 10^{-6}$ ). The small slope  
403 for the eyes on ipsilateral electrodes illustrates the striking fact that this component always  
404 occurs about 220 ms after the face onset or later; information received the earliest is thus  
405 processed at about the same time as information received 50-75 ms later (Arrow 4, Figure  
406 5). Regarding the middle negative component, its slope across stimulus moments was not  
407 different from 1 in most cases (slopes between 0.60 and 1.44,  $R^2_{\text{adj}} > .45$ ,  $df \geq 16$ ,  $t < 3.00$ ,  
408  $p_{\text{Bonf}} > .08$ ) except for the left eye on ROT in the gender task and for the mouth on ROT in  
409 the expression task (slopes  $> 1.69$ ,  $R^2_{\text{adj}} > .78$ ,  $t(22) > 3.68$ ,  $p_{\text{Bonf}} < .02$ ). In both these cases,  
410 the slope was significantly larger than 1. This is mostly a consequence of an increase in  
411 latency in the last stimulus moments (Arrow 5, Figures 5 and 6). Finally, in the case of the  
412 last positive component, the slope was significantly smaller than 1 for the eyes on the  
413 contralateral electrodes in the gender task and for the mouth on LOT in the expression task  
414 (slopes between 0.26 and 0.66,  $R^2_{\text{adj}} > .66$ ,  $df \geq 13$ ,  $t > 5.98$ ,  $p_{\text{Bonf}} < 2.0 \times 10^{-4}$ ) and it was  
415 approximately constant for the mouth in the gender task and on ROT in the expression task  
416 (slopes = 0.67 and 0.79,  $R^2_{\text{adj}} > .66$ ,  $df \geq 11$ ,  $t < 3.45$ ,  $p_{\text{Bonf}} > .07$ ).

417

### 418 **3.5 Investigating top-down modulations**

#### 419 *3.5.1 Effect of the amount of information presented beforehand*

420 The differences in processing across stimulus moments that we uncovered cannot  
421 be caused by differences in *what* has been seen before during a trial since sampling was  
422 random; however, *how much* was seen could have an influence, since the probability of  
423 already having shown information in a trial is greater in the last stimulus frame than in the

424 first one. Thus, the observed differences could be caused in part by bottom-up effects such  
 425 as adaptation or repetition priming. To investigate this possibility, we repeated the previous  
 426 regressions only with trials in which just one bubble was revealed: despite a greatly reduced  
 427 number of trials, results were remarkably similar (Pearson correlation of .95 between the  
 428 maps of regression coefficients; Figures S2 and S3), suggesting that the previously  
 429 observed effects are not caused by  
 430 differences in the amount of information  
 431 presented beforehand.

### 433 3.5.2 Interaction between stimulus 434 moment and task

435 The previous result alone does not  
 436 completely exclude the possibility of  
 437 bottom-up effects. To investigate whether  
 438 differences in activity across stimulus  
 439 moments could be explained at least in  
 440 part by top-down mechanisms, we  
 441 verified for each face feature, time point  
 442 and location, whether there was a  
 443 significant interaction between stimulus  
 444 moment and task, i.e. if the moment at  
 445 which information is received modulates  
 446 processing differently depending on the

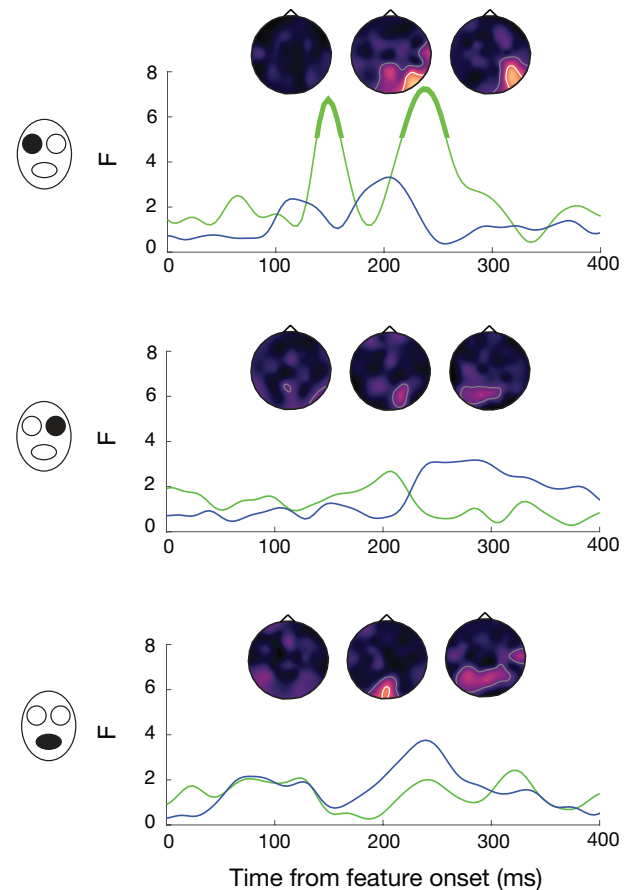

**Figure 8.** Interaction of stimulus moment and task on EEG activity, for each face feature. F values are shown for all latencies (from the feature onset) for LOT (blue) and ROT (green) sensors; bold segments indicate time points significant at the pixel level ( $p < .05$ , FWER-corrected across sensors and time). These F values indicate how much the activity variations across stimulus moments are influenced by the task. Topographies depict the temporal progression across the whole scalp: latencies of 100, 150 and 250 ms are shown. Lighter colors indicate higher F values; white curves indicate areas significant at the pixel level and gray curves indicate areas significant at the cluster level ( $p < .05$ , one-tailed, FWER-corrected across topography and time).

447 task. There was a significant interaction at several time points and locations, again mostly  
448 on occipito-temporal electrodes but also in more anterior locations. Contrary to what we  
449 observed with the main effect of stimulus moment, there is almost no significant interaction  
450 around 100 ms, but the peak effects are similarly around 150 and 250 ms on right occipito-  
451 temporal sensors (Figure 8). Note that on some more anterior sensors such as CP1,  
452 significant interactions peaked after 300 ms.

453

### 454 3.6 Relating sampling in the brain and in behavior

455 We evaluated where and when variations in brain activity across stimulus moments  
456 are related to variations in the behavioral use of information. Since differences in brain  
457 activity are likely related to the behavioral use of information in complex nonlinear ways,  
458 the mutual information (MI) metric was used. MI was computed across stimulus moments  
459 between coefficients resulting from the accuracy-weighted sums of sampling matrices

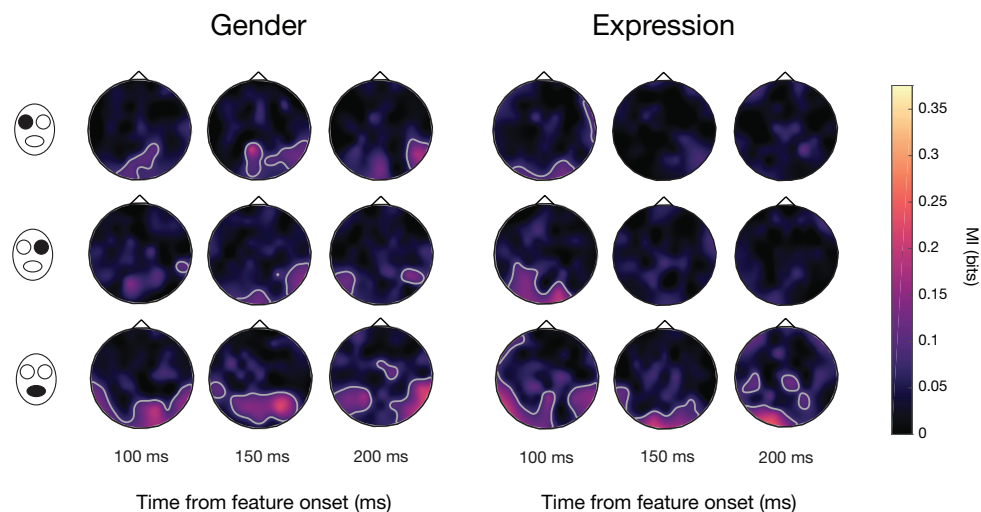

**Figure 9.** Mutual information (MI) between behavioral and brain coefficients, for selected latencies, for both tasks and all face features. High values indicate that the variations in EEG activity across stimulus moments relate to variations in behavioral accuracy across stimulus moments. Areas significant at the cluster level are outlined by gray lines ( $p < .05$ , one-tailed, FWER-corrected across topography and time).



460 (behavioral results) and the magnitudes of brain regression coefficients for each subject,  
461 face feature, latency from feature onset and electrode. Importantly, computing MI  
462 separately for each face feature allowed us to isolate the contribution of *within-feature*  
463 variations across stimulus moments. We observe significant MI mostly on occipito-  
464 temporal sensors at early and late latencies, but also in more anterior locations at later  
465 latencies (Figure 9). Regarding the eyes, significant MI is present early (<130 ms) and late  
466 (>250 ms) in both tasks, but it is present at intermediate latencies (~150-250 ms) only in  
467 the gender task. Interestingly, significant MI for the mouth is visible throughout the time  
468 course, for both tasks. While we did not uncover a significant behavioral use of the mouth  
469 in the gender task in our study, other studies have observed it, sometimes only when  
470 correlating feature visibility with response times instead of accuracy<sup>31-33</sup>. These results  
471 show that the origin of the variations in the use of information across stimulus moments  
472 can be traced back to variations in occipito-temporal activity at early and late latencies, and  
473 to variations in frontal activity at later latencies.

474

#### 475 **4 Discussion**

476

477 When we fixate an object, light impinges on our retinas in a continuous fashion, implying  
478 that our brain simultaneously processes information that is received at different moments,  
479 through time and cortical space. This is not typically considered in studies investigating  
480 the processing of visual objects, and so the processing uncovered in those studies  
481 corresponds to a combination of responses to information received at different moments.  
482 In our experiment, we randomly sampled the features of a face across time<sup>14</sup> while brain

483 activity was being measured to decompose this processing and uncover for the first time  
484 the brain activity related to information received at specific time points during a single eye  
485 fixation.

486 We first observed that information is processed differently depending on when it is  
487 received on the retina during the fixation. One of the most striking differences is seen in  
488 the ipsilateral representation of the eyes on occipito-temporal sensors in the gender task.  
489 The lateralized anatomy of the visual system tells us that each eye should be processed by  
490 the contralateral hemisphere first<sup>34-35</sup>: the ipsilateral representation is likely to have been  
491 transferred from an early contralateral representation<sup>36</sup>. Here, the contralateral  
492 representation appears to peak at a relatively constant offset of ~175 ms after information  
493 is received on the retina, independently of *when* it is received during the stimulus  
494 presentation (see the diagonal linear trend of the negative activations in Figure 5).  
495 However, the ipsilateral representation appears to be gated: all information received in the  
496 first 50 ms of fixation is represented at the same time, around 220 ms from face onset,  
497 while information received after 50 ms is represented with a fixed offset of ~120 ms,  
498 representation moment increasing linearly with stimulus moment as for the contralateral  
499 representation. Bearing in mind the fact that ipsilateral features must be first processed by  
500 the contralateral hemisphere, this suggests that around 220 ms, broadly consistent with the  
501 tail end of the classical N170 ERP event (see Figure 4), a channel is opened through which  
502 features can be transmitted across hemispheres. The N170 has been demonstrated to reflect  
503 cross-hemispheric transfer of visual features, with the peak ipsilateral representation of the  
504 eyes occurring after the contralateral peak of the N170 event<sup>36</sup>. The linear relationship  
505 between stimulus moment and representation moment after this gating event suggests that

506 the channel remains open during the remainder of fixation. Despite the same experimental  
507 stimuli, this gating phenomenon is only seen in the gender task, suggesting that it is specific  
508 to lateralized task-relevant features (the eyes being used almost exclusively for the gender  
509 task). In a recent study, the N170 also appeared to filter out task-irrelevant features: while  
510 both task-relevant and task-irrelevant features were processed prior to 170 ms, only task-  
511 relevant features were processed afterwards<sup>37</sup>. Of note, the cause of this gating cannot be  
512 repetition priming because it is also visible in trials where only one feature is revealed once.

513 Another notable result is the occurrence of two negative peaks instead of one in the  
514 contralateral representation of the eyes in the gender task, with the first one sensitive to  
515 only a narrow time window after the stimulus onset. Interestingly, in the case of the right  
516 eye, these two peaks have significantly distinct topographies, suggesting distinct neural  
517 generators. These generators might resemble the generators of the N170 since the  
518 activations are similarly peaking around 170 ms after the reception of eye information.  
519 Other studies have observed multiple peaks at the expected timing of the N170<sup>40-41</sup>; these  
520 are likely corresponding to activity from different generators. In one study, negative peaks  
521 around 160 ms have been found to originate from the fusiform gyrus while negative peaks  
522 around 180 ms have been localized as originating from the intraparietal sulcus<sup>41</sup>.  
523 Interestingly, if we exclude the first peak and only look at the biggest negative cluster, we  
524 notice a pattern that is similar to the positive cluster on the ipsilateral electrodes: all  
525 information received in the first ~50 ms is processed at about the same moment (peak  
526 around 200 ms) while information received afterwards is processed with a relatively  
527 constant (but slightly increasing) offset of 150-170 ms, representation moment increasing  
528 with stimulus moment. It is possible that a gating event occurs here too, preventing

529 processing by the sources of this component to start before ~200 ms after the face onset.  
530 This gating occurs at about the same latency as the ipsilateral gating, at the expected timing  
531 of the classical N170 ERP component.

532 Other differences in processing across stimulus moments are also visible. For  
533 example, the negative activation on ROT has an increased latency for late stimulus  
534 moments for some feature/task combinations (that is, this activation peaks after a longer  
535 time interval following the reception of information, if this information is received later).  
536 This may be a consequence of the prioritization of information received earlier. The visual  
537 system is likely to prioritize information received early since it might be unknown for how  
538 long information from that stimulus will reach the retina. Thus, the processing of  
539 information received late is likely to be delayed or processed more slowly. The opposite  
540 phenomenon was visible for the last positive activation in some cases: its latency was  
541 greater at early stimulus moments. In other words, there was “temporal compression”:  
542 information received earlier was “maintained” for a longer time and all information was  
543 processed at almost the same moment independently of when it was received on the retina.  
544 It is expected that information received at different moments is processed simultaneously  
545 at some point in the brain if it is to be integrated together by higher level areas. The  
546 temporal compression we observe may be a consequence of this process of accumulation  
547 and integration of information. This is consistent with other studies reporting a component  
548 at similar latencies associated with accumulation of evidence and temporal integration<sup>38-39</sup>.

549 Although adaptation or priming to previously seen features can be ruled out as a  
550 source of these differences because they are also present in trials with only one bubble, a  
551 bottom-up cause still might have been possible. For instance, different parts of the visual

552 field may always be processed at specific moments during fixation. To investigate whether  
553 there were top-down origins to the effects we observed, we verified whether the task  
554 modulated them. We found significant interactions between information stimulus moment  
555 and task on several sensors at many latencies. In other words, the differences observed in  
556 the processing of information received at different moments were not the same depending  
557 on the task: consequently, these differences are at least partly top-down in origin.  
558 Significant interactions were observed at electrodes and latencies similar to those of the  
559 significant effects of stimulus moment but started slightly later, a result that is expected for  
560 top-down modulations. Moreover, significant interactions were occurring in slightly  
561 different areas. For example, while the processing of the mouth was globally more  
562 modulated by stimulus moment on right occipital electrodes, the interaction with the task  
563 was stronger on central and left occipital electrodes. This suggests that bottom-up  
564 mechanisms and top-down sampling are taking place in different loci.

565         That the brain processes information differently according to when it was received  
566 during fixation, that this occurs even when only one such information is revealed in the  
567 course of a trial, and that these differences are modulated by the task, all suggest that each  
568 time slot is assigned a different “role” in a top-down fashion. This is compatible with the  
569 idea of ballistic visual routines: different operations may be applied to the visual input in a  
570 sequential fashion, these operations may vary according to the goal of the computation,  
571 and the outcome of the first steps does not change the operations applied thereafter<sup>5,23</sup>. A  
572 non-uniform time course of the behavioral use of information in visual recognition has  
573 been observed in a few studies<sup>11,14,16</sup>; here, we demonstrate it in the brain for the first time  
574 and we show that it is at least partly top-down in origin. Moreover, the variations in

575 processing across stimulus moments relate to variations in behavior; that is, as it could be  
576 expected, how the brain (particularly occipito-temporal areas) processes information  
577 received at a specific moment relates to how this information will be used to perform the  
578 task.

579 In summary, we uncovered in this study the neural response to specific information  
580 received at specific moments during fixation and we showed that when light is received on  
581 the retina matters: processing is modulated by the specific moment at which information is  
582 received, even within a single eye fixation. These differences can be quite striking, such as  
583 an additional delay of 100 ms for information received at some moments. Importantly,  
584 these variations remain even when we account for information perceived beforehand, and  
585 they are modulated by the task. Moreover, they correlate to differences in the use of  
586 information for the task. These results suggest that task-dependent visual routines of  
587 information sampling are applied top-down to the continuous visual input.

588 The novel method introduced in this article also seems a promising avenue to shed  
589 light on the accumulation and integration of information occurring during object  
590 recognition: indeed, it should allow us to visualize the simultaneous processing, at a given  
591 time point and location, of information that was received on the retina at different time  
592 points. Future studies using more spatially resolved brain imaging methods such as MEG  
593 should investigate how information received at different moments is processed,  
594 accumulated, integrated and transferred across brain regions. This method could also be  
595 used with intrinsically dynamic stimuli such as dynamic facial expressions or naturalistic  
596 movies to investigate how an observer integrates evolving information.

597

598

## References

599

- 600 1. Broadbent, D. E. *Perception and communication*. (Pergamon Press, Oxford, 1958).
- 601 2. Desimone, R. & Duncan, J. Neural Mechanisms of Selective Visual Attention. *Ann.*  
602 *Rev. Neurosci.* **18**, 193–222 (1995).
- 603 3. Carrasco, M. Visual attention: The past 25 years. *Vision Res.* **51**, 1484–1525 (2011).
- 604 4. Baluch, F. & Itti, L. Mechanisms of top-down attention. *Trends Neurosci.* **34**, 210–  
605 224 (2011).
- 606 5. Ullman, S. Visual Routines. *Cognition.* **18**, 97–159 (1984).
- 607 6. Marr, D. *Vision: A computational investigation into the human representation and*  
608 *processing of visual information*. (MIT Press, Cambridge, 1982).
- 609 7. Watt, R. J. Scanning from coarse to fine spatial scales in the human visual system  
610 after the onset of a stimulus. *J. Opt. Soc. Am. A* **4**, 2006–2021 (1987).
- 611 8. Bartels, A. & Zeki, S. The temporal order of binding visual attributes. *Vision Res.*  
612 **46**, 2280–2286 (2006).
- 613 9. Dupuis-Roy, N., Faghel-Soubeyrand, S. & Gosselin, F. Time course of the use of  
614 chromatic and achromatic facial information for sex categorization. *Vision Res.* (In  
615 press).
- 616 10. VanRullen, R. Four common conceptual fallacies in mapping the time course of  
617 recognition. *Front. Psychol.* **2**, 365 (2011).
- 618 11. Blais, C., Roy, C., Fiset, D., Arguin, M. & Gosselin, F. The eyes are not the window  
619 to basic emotions. *Neuropsychologia* **50**, 2830–2838 (2012).

- 620 12. Caplette, L., Wicker, B. & Gosselin, F. Atypical Time Course of Object Recognition  
621 in Autism Spectrum Disorder. *Sci Rep* **6**, 35494 (2016).
- 622 13. Caplette, L., Wicker, B., Gosselin, F. & West, G. L. Hand Position Alters Vision by  
623 Modulating the Time Course of Spatial Frequency Use. *J. Exp. Psychol.: Gen.* **7**,  
624 917–923 (2017).
- 625 14. Vinette, C., Gosselin, F. & Schyns, P. Spatio-temporal dynamics of face recognition  
626 in a flash: it's in the eyes. *Cogn. Sci.* **28**, 289–301 (2004).
- 627 15. Nagai, M., Bennett, P. J. & Sekuler, A. B. Spatiotemporal templates for detecting  
628 orientation-defined targets. *J. Vision* **7**, 11 (2007).
- 629 16. Neri, P. & Levi, D. M. Temporal Dynamics of Figure-Ground Segregation in Human  
630 Vision. *J. Neurophysiol.* **97**, 951–957 (2007).
- 631 17. Fiebelkorn, I. C., Saalman, Y. B. & Kastner, S. Rhythmic Sampling within and  
632 between Objects despite Sustained Attention at a Cued Location. *Curr. Biol.* **23**,  
633 2553–2558 (2013).
- 634 18. Landau, A. N. & Fries, P. Attention Samples Stimuli Rhythmically. *Curr. Biol.* **22**,  
635 1000–1004 (2012).
- 636 19. Neri, P. & Heeger, D. J. Spatiotemporal mechanisms for detecting and identifying  
637 image features in human vision. *Nat. Neurosci.* **5**, 812–816 (2002).
- 638 20. Latour, P. L. Evidence of internal clocks in the human operator. *Acta Psychol.* **27**,  
639 341–348 (1967).
- 640 21. Neri, P. & Levi, D. Temporal dynamics of directional selectivity in human vision.  
641 *J. Vision* **8**, 22 (2008).



- 642 22. Tse, P. U. Mapping visual attention with change blindness: new directions for a new  
643 method. *Cogn. Sci.* **28**, 241–258 (2004).
- 644 23. Caplette, L., McCabe, E., Blais, C. & Gosselin, F. The Time Course of Object,  
645 Scene, and Face Categorization. *Handbook of Categorization in Cognitive Science*  
646 *(2<sup>nd</sup> Edition)*. (Elsevier, Amsterdam, 2017).
- 647 24. Parker, D. M., Lishman, J. R. & Hughes, J. Role of coarse and fine spatial  
648 information in face and object processing. *J. Exp. Psychol. Hum. Percept. Perform.*  
649 **22**, 1448 (1996).
- 650 25. Hughes, H. C., Nozawa, G. & Kitterle, F. Global precedence, spatial frequency  
651 channels, and the statistics of natural images. *J. Cogn. Neurosci.* **8**, 197–230 (1996).
- 652 26. Schyns, P. G. & Oliva, A. Dr. Angry and Mr. Smile: when categorization flexibly  
653 modifies the perception of faces in rapid visual presentations. *Cognition* **69**, 243–  
654 265 (1999).
- 655 27. Bacon-Macé, N., Macé, M. J. M., Fabre-Thorpe, M. & Thorpe, S. J. The time course  
656 of visual processing: Backward masking and natural scene categorisation. *Vision*  
657 *Res.* **45**, 1459–1469 (2005).
- 658 28. Brisson, B. & Jolicoeur, P. The N2pc component and stimulus duration.  
659 *NeuroReport.* **18**, 1163–1166 (2007).
- 660 29. Tanskanen, T., Näsänen, R., Ojanpää, H. & Hari, R. Face recognition and cortical  
661 responses: Effect of stimulus duration. *NeuroImage.* **35**, 1636–1644 (2007).
- 662 30. Kauffmann, L., Chauvin, A., Pichat, C. & Peyrin, C. Effective connectivity in the  
663 neural network underlying coarse-to-fine categorization of visual scenes. A dynamic  
664 causal modeling study. *Brain & Cognition* **99**, 46–56 (2015).

- 665 31. Dupuis-Roy, N., Fortin, I., Fiset, D. & Gosselin, F. Uncovering gender  
666 discrimination cues in a realistic setting. *J. Vision* **9**, 10 (2009).
- 667 32. Gosselin, F. & Schyns, P. G. Bubbles: a technique to reveal the use of information  
668 in recognition tasks. *Vision Res.* **41**, 2261–2271 (2001).
- 669 33. Schyns, P. G., Bonnar, L. & Gosselin, F. Show me the features! Understanding  
670 recognition from the use of visual information. *Psychol. Sci.* **13**, 402–409 (2002).
- 671 34. Essen, D. V., Newsome, W. T. & Bixby, J. L. The pattern of interhemispheric  
672 connections and its relationship to extrastriate visual areas in the macaque monkey.  
673 *J. Neurosci.* **2**, 265–283 (1982).
- 674 35. Saenz, M. & Fine, I. Topographic organization of V1 projections through the corpus  
675 callosum in humans. *Neuroimage* **52**, 1224–1229.
- 676 36. Ince, R. A. A., Jaworska, K., Gross, J., Panzeri, S., van Rijsbergen, N. J., Rousselet,  
677 G. A. & Schyns, P. G. The deceptively simple N170 reflects network information  
678 processing mechanisms involving visual feature coding and transfer across  
679 hemispheres. *Cereb. Cortex* **26**, 4123–4135 (2016).
- 680 37. Zhan, J., Ince, R. A. A., van Rijsbergen, N. J. & Schyns, P. G. Dynamic construction  
681 of reduced representations in the brain for perceptual decision behavior. *Curr. Biol.*  
682 **29**, 1–8 (2019).
- 683 38. Twomey, D. M., Murphy, P. R., Kelly, S. P. & O’Connell, R. G. The classic P300  
684 encodes a build-to-threshold decision variable. *Eur. J. Neurosci.* **42**, 1636–1643  
685 (2015).

- 686 39. O’Connell, R. G., Dockree, P. M. & Kelly, S. P. A supramodal accumulation-to-  
687 bound signal that determines perceptual decisions in humans. *Nat. Neurosci.* **15**,  
688 1729–1735 (2012).
- 689 40. Suzuki, M. & Noguchi, Y. Reversal of the face-inversion effect in N170 under  
690 unconscious visual processing. *Neuropsychol.* **51**, 400–409 (2013).
- 691 41. Di Russo, F., Stella, A., Spitoni, G., Strappini, F., Sdoia, S., Galati, G., Hillyard, S.  
692 A., Spinelli, D. & Pitzalis, S. Spatiotemporal brain mapping of spatial attention  
693 effects on pattern-reversal ERPs. *Hum. Brain Mapp.* **33**, 1334–1351 (2012).
- 694 42. Brainard, D. H. The Psychophysics Toolbox. *Spat. Vis.* **10**, 433–436 (1997).
- 695 43. Pelli, D. G. The VideoToolbox software for visual psychophysics: transforming  
696 numbers into movies. *Spat. Vis.* **10**, 437–442 (1997).
- 697 44. Kleiner, M., Brainard, D. & Pelli, D. What’s new in Psychtoolbox-3? *Perception*  
698 **36**, ECVF Abstract Supplement (2007).
- 699 45. Goeleven, E., De Raedt, R., Leyman, L. & Verschuere, B. The Karolinska Directed  
700 Emotional Faces: A validation study. *Cogn. Emot.* **22**, 1094–1118 (2008).
- 701 46. Willenbockel, V., Sadr, J., Fiset, D., Horne, G. O., Gosselin, F. & Tanaka, J. W.  
702 Controlling low-level image properties: The SHINE toolbox. *Behav. Res. Meth.* **42**,  
703 671–684 (2010).
- 704 47. Holmes, A. P., Blair, R. C., Watson, J. D. G. & Ford, I. Nonparametric Analysis of  
705 Statistic Images from Functional Mapping Experiments. *J. Cereb. Blood Flow*  
706 *Metab.* **16**, 7–22 (1996).

- 707 48. Oostenveld, R., Fries, P., Maris, E. & Schoffelen, J.-M. FieldTrip: Open Source  
708 Software for Advanced Analysis of MEG, EEG, and Invasive Electrophysiological  
709 Data. *Comp. Intell. Neurosci.* **2011**, 156869 (2011).
- 710 49. Hyvärinen, A. Fast and Robust Fixed-Point Algorithms for Independent Component  
711 Analysis. *IEEE Trans. Neural Networks* **10**, 626–634.
- 712 50. Kayser, J. & Tenke, C. E. Principal components analysis of Laplacian waveforms as  
713 a generic method for identifying ERP generator patterns: I. evaluation with auditory  
714 oddball tasks. *Clin. Neurophysiol.* **117**, 348–368 (2006).
- 715 51. Tenke, C. E. & Kayser, J. Generator localization by current source density (CSD):  
716 Implications of volume conduction and field closure at intracranial and scalp  
717 resolutions. *Clin. Neurophysiol.* **123**, 2328–2345 (2012).
- 718 52. Sandwell, D. T. Biharmonic spline interpolation of GEOS-3 and SEASAT altimeter  
719 data. *Geophysica Res. Letters* **14**, 139–142 (1987).
- 720 53. Ince, R. A. A., van Rijsbergen, N. J., Thut, G., Rousset, G. A., Gross, J., Panzeri,  
721 S. & Schyns, P. G. Tracing the Flow of Perceptual Features in an Algorithmic Brain  
722 Network. *Sci. Rep.* **5**, 17681 (2015).
- 723 54. Ince, R. A. A., Giordano, B. L., Kayser, C., Rousset, G. A., Gross, J. & Schyns, P.  
724 G. A statistical framework for neuroimaging data analysis based on mutual  
725 information estimated via a gaussian copula. *Hum Brain Mapp* **38**, 1541–1573  
726 (2017).
- 727
- 728
- 729

730

## Acknowledgements

731

732 The study was supported by a Discovery Grant (04777-2014) from NSERC to F. G. and  
733 by an Alexander-Graham-Bell Doctoral Scholarship from NSERC to L. C.

734

## Supplementary Figures

735

736 **Figure S1**

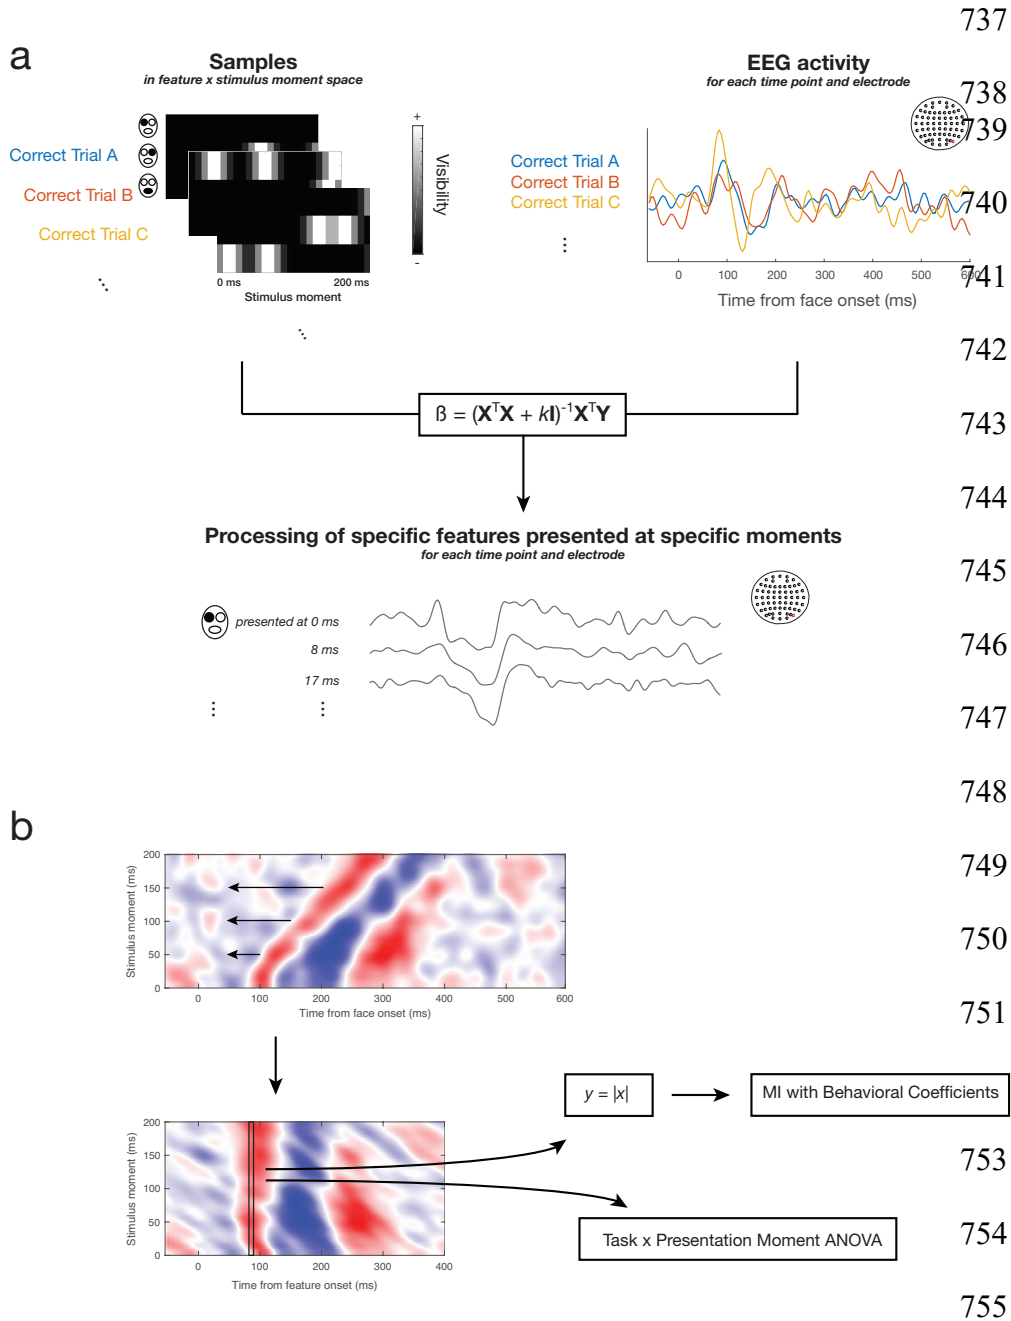

756

757

758 **Figure S2**

759

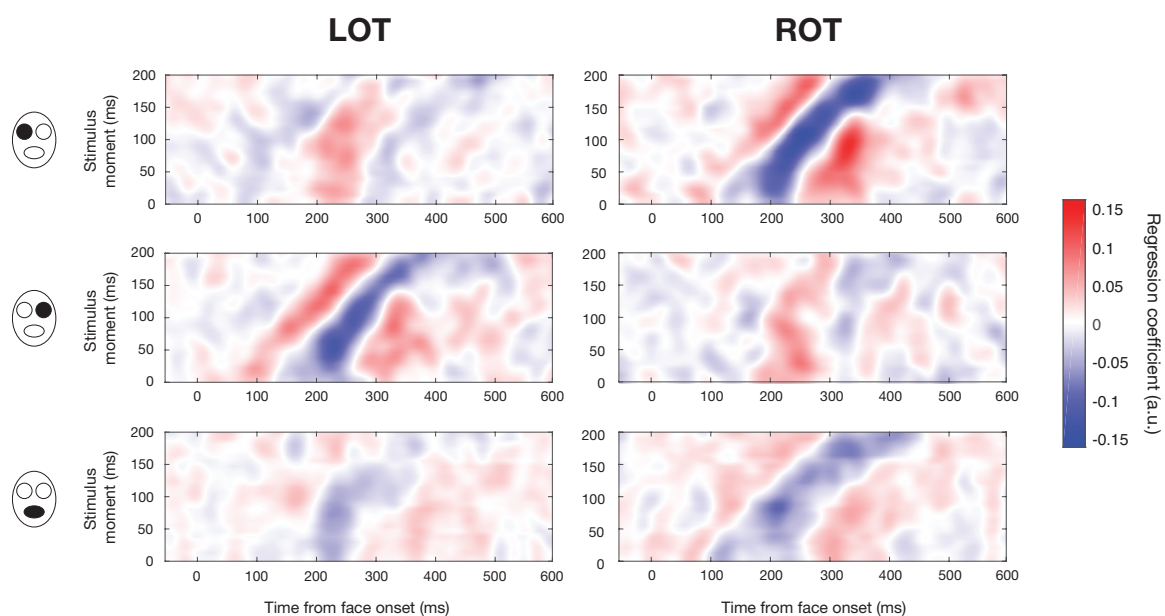

760

761

762 **Figure S3**

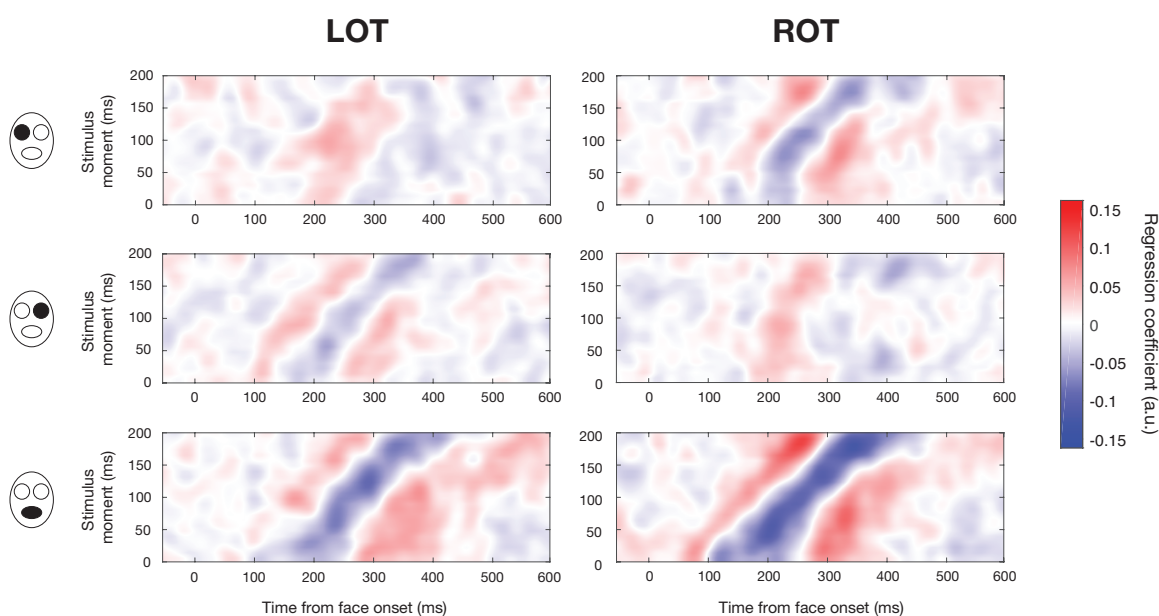

763

764

765 **Figure S4**

766

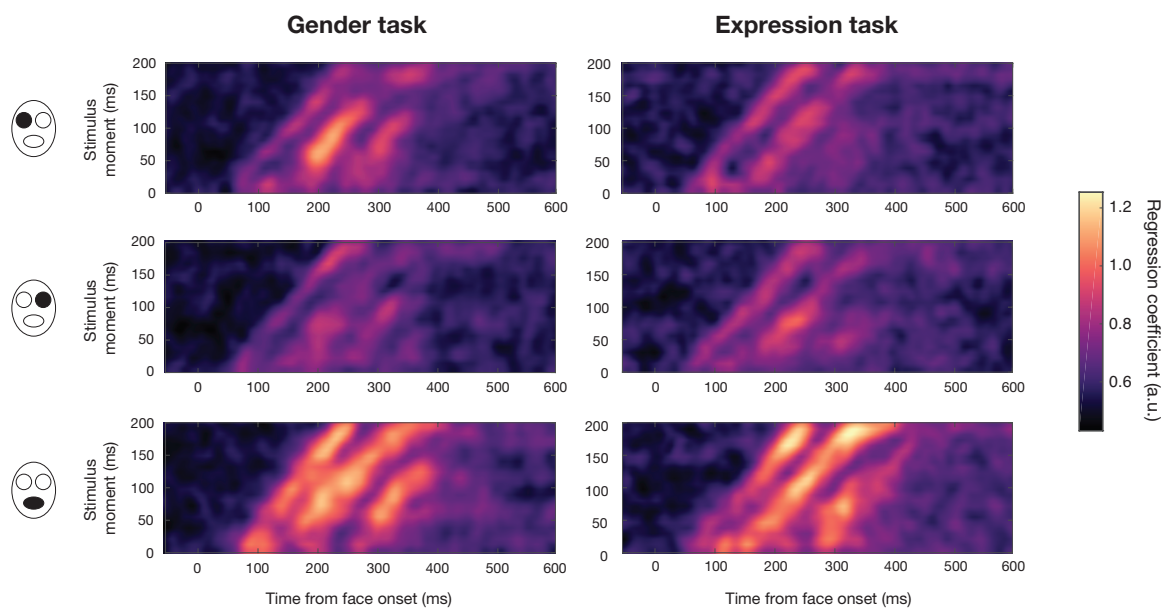



767

## Supplementary Figure Legends

768

769 **Figure S1.** EEG data analyses. **A)** On each trial, a random sampling matrix determines  
770 how much each face feature is visible on each presentation moment (the *samples*). Only  
771 sampling matrices of truly correct trials (see Methods: EEG Data Analysis) are kept. On  
772 each corresponding trial, EEG activity is also recorded across the scalp for a certain period  
773 of time (examples are shown for one electrode). For each subject, samples (**X**; independent  
774 variable) and EEG activity (**Y**; dependent variable) are combined using a regularized  
775 (ridge) multiple linear regression, which allows us to uncover the EEG activity, across time  
776 and across the scalp (examples are shown for one electrode), related to the presentation of  
777 each specific face feature shown at each stimulus moment. These time courses of regression  
778 coefficients can be arranged in images (maps) for specific face features and electrodes  
779 where amplitude is now represented by color (see panel B or figures 5 and 6 of the  
780 manuscript). **B)** Prior to further analyses, maps of regression coefficients are rearranged so  
781 that the zero point is the onset of the feature instead of the whole face (note the change of  
782 the *x*-axis title). More specifically, EEG activity related to the presentation of a feature 8.3  
783 ms after the face onset is shifted left by 8.3 ms, EEG activity related to the presentation of  
784 a feature 16.7 ms after the face onset is shifted left by 16.7 ms, etc. (see Methods: EEG  
785 Data Analysis). Only the first 400 ms are kept so that there is the same number of time  
786 points associated with each stimulus moment. Each 24-element column of this realigned  
787 image (activity across stimulus moments for each latency from the feature onset) is then  
788 submitted to subsequent analyses (example illustrated for one column). In the task *x*  
789 presentation moment ANOVA, columns are compared across subjects and the effect of the

790 task (between-subject factor), the effect of the stimulus moment (within-subject factor),  
791 and the interaction between those factors are computed. Prior to the mutual information  
792 (MI) analysis, coefficients are transformed into their absolute values. For each subject,  
793 mutual information is then computed between the column of values and the vector of 24  
794 values obtained in the behavioral analysis (see Methods: Behavioral data analysis)  
795 associated to the same face feature.

796

797 **Figure S2.** Mean maps of regression coefficients for the gender task, for LOT and ROT  
798 sensors (columns) and for each face feature (rows), when including only trials in which  
799 there was one bubble (one feature revealed once). See Figure 5 in the main manuscript.

800

801 **Figure S3.** Mean maps of regression coefficients for the expression task, for LOT and ROT  
802 sensors (columns) and for each face feature (rows), when including only trials in which  
803 there was one bubble (one feature revealed once). See Figure 6 in the main manuscript.

804

805 **Figure S4.** Global scalp regression coefficients for the gender and expression task  
806 (columns), for each face feature (rows). To compute these maps, we computed the global  
807 field power (standard deviation across sensors) of the regression coefficients for each task  
808 and face feature.

809

810

811

812

813 **Supplementary Movie Legends**

814

815 **Movie S1.** Example of a random stimulus.

816

817 **Movie S2.** Same as Movie S1; slowed down 10 times.

818

819 **Movie S3.** Another example of a random stimulus.

820

821 **Movie S4.** Same as Movie S3; slowed down 10 times.
